# Supplementary material
Source: publisher figshare collection journal article supplement (https://karger.figshare.com/ndownloader/files/12382355)
Supplement: Supplementary file 1 [file 12382355]

| Supplemental Table 1 Association between RV-index and the combined endpoint (adjusted for each of the three adjustment sets)   |  | Hamburg | | | | | | Heidelberg | | | | | | | --- | --- | --- | --- | --- | --- | --- | --- | --- | --- | --- | --- | --- | |  | **Adjusted for sex and age** | | **Adjusted for sex, age and NT-proBNP** | | **Adjusted for sex, age, NT-proBNP and 6MWD** | | **Adjusted for sex and age** | | **Adjusted for sex, age and NT-proBNP** | | **Adjusted for sex, age, NT-proBNP and 6MWD** | | |  | **HR**  **(95% CI)** | **p** | **HR**  **(95% CI)** | **p** | **HR**  **(95% CI)** | **p** | **HR**  **(95% CI)** | **p** | **HR**  **(95% CI)** | **p** | **HR**  **(95% CI)** | **p** | | RV-index  (per 100 points increase) | 1.26  (1.08, 1.47) | 0.0027 | 1.22  (1.05, 1.42) | 0.011 | 1.21  (1.04, 1.40) | 0.014 | 2.27 (1.46, 3.51) | <0.001 | 2.74 (1.65, 4.53) | <0.001 | 2.28 (1.25, 4.15) | 0.0070 | | Age at  right heart  catheter | 1.03  (1.01, 1.06) | 0.013 | 1.03  (1.00, 1.06) | 0.023 | 1.03  (1.00, 1.05) | 0.055 | 1.06 (1.00, 1.11) | 0.044 | 1.07 (1.01, 1.14) | 0.021 | 1.06 (1.00, 1.13) | 0.058 | | Sex (male) | 0.92  (0.47, 1.80) | 0.80 | 1.04  (0.51, 2.10) | 0.92 | 1.05  (0.52, 2.12) | 0.89 | 0.60 (0.21, 1.75) | 0.35 | 0.90 (0.28, 2.85) | 0.86 | 0.72 (0.21, 2.41) | 0.59 | | NT-proBNP | … | … | 1.00 (1.00, 1.00) | 0.097 | 1.00 (1.00, 1.00) | 0.24 | … | … | 1.00 (1.00, 1.00) | 0.20 | 1.00 (1.00, 1.00) | 0.15 | | 6-minute  walk test | … | … | … | … | 1.00 (1.00, 1.00) | 0.39 | … | … | … | … | 1.00 (0.99, 1.00) | 0.27 | |  |  |  |
| --- | --- | --- | --- | --- | --- | --- | --- | --- | --- | --- | --- | --- | --- | --- | --- | --- | --- | --- | --- | --- | --- | --- | --- | --- | --- | --- | --- | --- | --- | --- | --- | --- | --- | --- | --- | --- | --- | --- | --- | --- | --- | --- | --- | --- | --- | --- | --- | --- | --- | --- | --- | --- | --- | --- | --- | --- | --- | --- | --- | --- | --- | --- | --- | --- | --- | --- | --- | --- | --- | --- | --- | --- | --- | --- | --- | --- | --- | --- | --- | --- | --- | --- | --- | --- | --- | --- | --- | --- | --- | --- | --- | --- | --- | --- | --- | --- | --- | --- | --- | --- | --- | --- | --- | --- | --- | --- | --- |
